# Supplementary material
Source: ML conference proceedings conference paper supplement (https://proceedings.mlr.press/v164/stengel-eskin22a.html)
Supplement: Supplementary file 1 [file stengel-eskin22a-supp.zip]

Archive with 7 entries (6 files):
- __MACOSX/._supplementary
- __MACOSX/supplementary/._.DS_Store
- __MACOSX/supplementary/._appendices.pdf
- __MACOSX/supplementary/._natural language instructions proof of concept.mp4
- supplementary/
- supplementary/.DS_Store
- supplementary/appendices.pdf
